# Supplementary material for: Metal ion adsorption at the ionic liquid–mica interface
Source: Royal Society of Chemistry journal article supplement (doi:10.1039/c5nr05833c), 2015-12-08
Supplement: c5nr05833c1.pdf [file c5nr05833c1.pdf]

*Samila McDonald,<sup>a</sup> Aaron Elbourne,<sup>a</sup> Gregory G. Warr,<sup>b</sup> Rob Atkin<sup>a,\*</sup>*

<sup>a</sup>Discipline of Chemistry, The Newcastle Institute for Energy and Resources, The University of Newcastle,  
Newcastle, NSW, Australia

<sup>b</sup>School of Chemistry, University of Sydney, Sydney, NSW, Australia

[\\*rob.atkin@newcastle.edu.au](mailto:rob.atkin@newcastle.edu.au)

$K^+$  (0.30 nm)

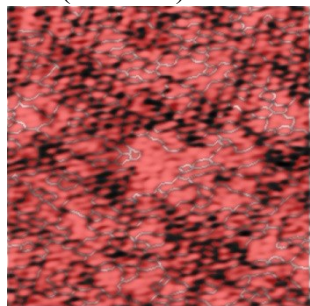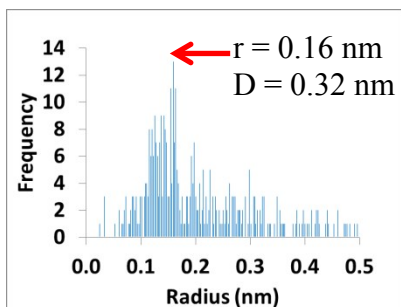

$Na^+$  (0.23 nm)

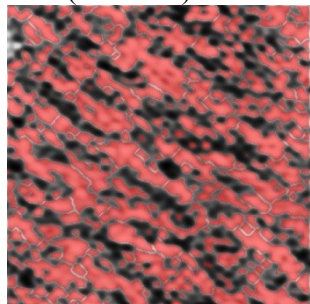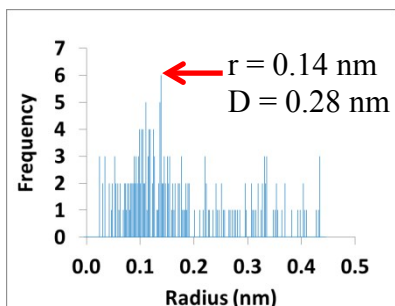

$Li^+$  (0.18 nm)

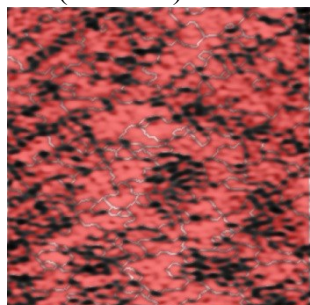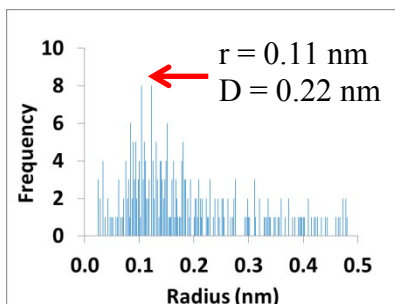

$Ca^{2+}$  (0.23 nm)

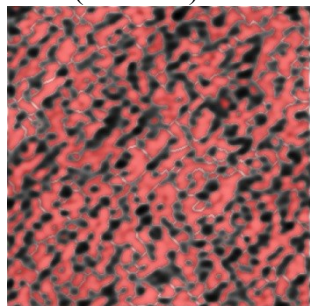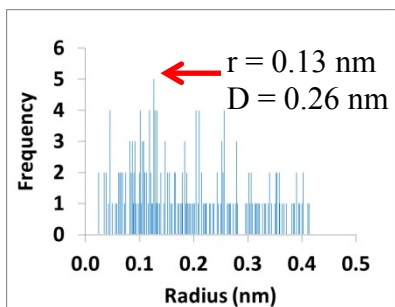

$Mg^{2+}$  (0.17 nm)

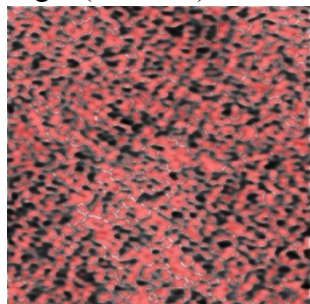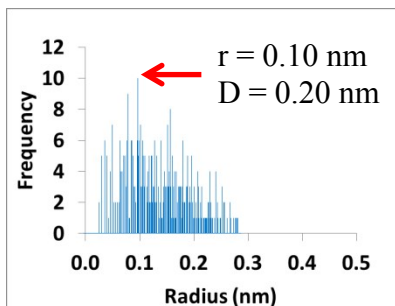

**Figure S1.** 10 x 10 nm AM-AFM phase images of PAN + metal cation solutions (bare ionic diameter in brackets) on mica with grain analysis (grains marked in red on the figures) and the corresponding ion radius distribution histogram. The maximum radius value is also shown as a diameter (all in nm).
